1 **The grape powdery mildew resistance loci *Ren2*, *Ren3*, *Ren4D*,**  
2 ***Ren4U*, *Run1*, *Run1.2b*, *Run2.1*, and *Run2.2* activate different**  
3 **transcriptional responses to *Erysiphe necator***

4

5 Mélanie Massonnet<sup>1</sup>, Summaira Riaz<sup>1</sup>, Dániel Pap<sup>1</sup>, Rosa Figueroa-Balderas<sup>1</sup>, M. Andrew  
6 Walker<sup>1</sup>, Dario Cantu<sup>1\*</sup>

7 <sup>1</sup>Department of Viticulture and Enology, University of California Davis, Davis, CA, United States

8

9 \* Correspondence: [dacantu@ucdavis.edu](mailto:dacantu@ucdavis.edu)

10

11 **Running title:** Functional diversity of R loci in grapes

12

13 **Keywords:** Grape, powdery mildew, genetic disease resistance, disease evaluation, comparative  
14 transcriptomics

15

## 16 Abstract

17 Multiple grape powdery mildew (PM) genetic resistance (*R*) loci have been found in wild grape  
18 species. Little is known about the defense responses associated with each *R* locus. In this study,  
19 we compare the defense mechanisms associated with PM resistance in interspecific crosses  
20 segregating for a single *R* locus from *Muscadinia rotundifolia* (*Run1*, *Run1.2b*, *Run2.1*, *Run2.2*),  
21 *Vitis cinerea* (*Ren2*), *V. rotundifolia* (*Ren4D* and *Ren4U*), and the interspecific hybrid Villard blanc  
22 (*Ren3*). By combining optical microscopy, visual scoring, and biomass estimation, we show that  
23 the eight *R* loci confer resistance by limiting infection at different stages. We assessed the defense  
24 mechanisms triggered in response to PM at 1 and 5 days post inoculation (dpi) via RNA  
25 sequencing. To account for the genetic differences between species, we developed for each  
26 accession a diploid synthetic reference transcriptome by incorporating into the PN40024 reference  
27 homozygous and heterozygous sequence variants and *de novo* assembled transcripts. Most of the  
28 *R* loci exhibited a higher number of differentially expressed genes (DEGs) associated with PM  
29 resistance at 1 dpi compared to 5 dpi, suggesting that PM resistance is mostly associated with an  
30 early transcriptional reprogramming. Comparison of the PM resistance-associated DEGs showed  
31 a limited overlap between pairs of *R* loci, and nearly half of the DEGs were specific to a single *R*  
32 locus. The largest overlap of PM resistance-associated DEGs was found between *Ren3*<sup>+</sup>, *Ren4D*<sup>+</sup>,  
33 and *Ren4U*<sup>+</sup> genotypes at 1 dpi, and between *Ren4U*<sup>+</sup> and *Run1*<sup>+</sup> accessions at 5 dpi. The *Ren3*<sup>+</sup>,  
34 *Ren4D*<sup>+</sup>, and *Ren4U*<sup>+</sup> were also found to have the highest number of *R* locus-specific DEGs in  
35 response to PM. Both shared and *R* locus-specific DEGs included genes from different defense-  
36 related categories, indicating that the presence of *E. necator* triggered distinct transcriptional  
37 responses in the eight *R* loci.

## 38 **Introduction**

39 Most cultivated grapevines (*Vitis vinifera* ssp. *vinifera*) are highly susceptible to powdery mildew  
40 (PM), a disease caused by the ascomycete *Erysiphe necator* Schwein (syn. *Uncinula necator*).  
41 *Erysiphe necator* is an obligate biotrophic pathogen that can infect any green tissue of the host.  
42 PM infections lead to reduced yield, and impaired fruit composition and wine quality (Calonnec  
43 *et al.*, 2004; Stummer *et al.*, 2005). Genetic resistance to PM has been found in several wild grapes,  
44 such as the North American grapes *Muscadinia rotundifolia* and *Vitis cinerea*, the Chinese *Vitis*  
45 species *V. piasezkii*, *V. romanetii*, *V. quinquangularis* and *V. pseudoreticulata*, and some Central  
46 Asian accessions of *V. vinifera* ssp. *sylvestris* (Dry *et al.*, 2019). So far, thirteen PM resistance (*R*)  
47 loci have been genetically mapped (Dry *et al.*, 2019; Karn *et al.*, 2021) and named *Resistance to*  
48 *Uncinula necator* (*Run*) or *Resistance to Erysiphe necator* (*Ren*). Different allelic forms have been  
49 found for some of *Run* and *Ren* loci (Dry *et al.*, 2019; Massonnet *et al.*, 2022).

50 For most PM-resistant grape accessions, resistance to *E. necator* is associated with a programmed  
51 cell death (PCD)-mediated response (Qiu *et al.*, 2015; Dry *et al.*, 2019). Because PCD occurs in  
52 epidermal cells post-penetration of *E. necator*, the recognition of *E. necator*'s effectors by  
53 intracellular nucleotide-binding leucine-rich repeat (NLR) proteins is likely the trigger of PCD  
54 (Qiu *et al.*, 2015; Dry *et al.*, 2019). Only one NLR gene associated with PM resistance, *MrRUN1*,  
55 has been characterized in *M. rotundifolia* G52 (Feechan *et al.*, 2013) and candidate NLR genes  
56 associated with *Run1.2b* and *Run2.2* have been proposed for *M. rotundifolia* Trayshed (Massonnet  
57 *et al.*, 2022).

58 In plants, NLR activation leads to multiple cellular responses, such as the generation of reactive  
59 oxygen species (ROS), calcium oscillations, kinase activation, and an extensive transcriptional  
60 reprogramming resulting in the activation of defense-related mechanisms, including the  
61 biosynthesis of pathogenesis-related (PR) proteins and antimicrobial compounds, and cell wall  
62 modifications (Dangl *et al.*, 2013; Lolle *et al.*, 2020). NLR-triggered immunity generally involves  
63 PCD at the site of infection, which inhibits the development of the pathogen (Dangl *et al.*, 2013;  
64 Lolle *et al.*, 2020). In grapes, few studies have investigated the transcriptomic responses to *E.*  
65 *necator* infection in PM-resistant accessions (Amrine *et al.*, 2015; Jiao *et al.*, 2021; Weng *et al.*,  
66 2014). For example, comparative transcriptomics revealed that *E. necator* infection leads to  
67 diverse whole-genome transcriptional responses among Central Asian *V. vinifera* accessions

68 carrying different allelic forms of the *Ren1* locus (Amrine *et al.*, 2015). Whether the resistance  
69 conferred by different *R* loci depends on the activation of the same or different defense responses  
70 is still an open question. Understanding the functional differences and overlap between *R* loci will  
71 help select the most functionally diverse *R* loci to develop new *V. vinifera* cultivars that combine  
72 durable resistance to PM and high-quality fruit production (Michelmore *et al.*, 2013). However,  
73 comparing genome-wide transcriptional changes in response to PM between *R* loci from different  
74 *Vitis* species is challenging. Comparative transcriptomics using RNA sequencing (RNA-seq) data  
75 relies on a reference transcriptome to evaluate transcript abundance. Recent studies showed that  
76 grape genomes are highly heterozygous and substantially differ between *Vitis* species (Zhou *et al.*,  
77 2019; Liang *et al.*, 2019; Cochetel *et al.*, 2021; Minio *et al.*, 2022). A single haploid reference  
78 transcriptome from a PM-susceptible *V. vinifera* biases the alignment of the RNA-seq reads,  
79 underestimating the expression of alleles that are less similar to the reference, and confounding the  
80 subsequent testing of differential gene expression.

81 In this study, we aimed to identify the defense mechanisms associated with eight *R* loci (*Ren2*,  
82 *Ren3*, *Ren4D*, *Ren4U*, *Run1*, *Run1.2b*, *Run2.1*, and *Run2.2*) and to evaluate the functional  
83 differences and overlap between them. First, we monitored PM disease development on leaves of  
84 eight PM-resistant breeding lines, each representing a genetic *R* locus, as well as four PM-  
85 susceptible sib lines and two PM-susceptible *V. vinifera* parents. Defense mechanisms associated  
86 with each *R* locus were then assessed by profiling the leaf transcriptome with or without *E. necator*  
87 inoculations. To enable the comparison of the transcriptional modulation in response to PM, we  
88 constructed comparable reference transcriptomes incorporating both sequence variant information  
89 into the reference transcriptome of PN40024 and *de novo* assembled transcripts. We also refined  
90 the functional annotation of PN40024 predicted proteome to focus our analysis on genes involved  
91 in defense mechanisms. Defense-related genes differentially expressed in response to the pathogen  
92 were first compared between PM-resistant and PM-susceptible accessions to identify the genes  
93 with a transcriptional modulation associated with PM resistance. The latter ones were then  
94 compared between PM-resistant genotypes to evaluate the functional overlap between the different  
95 *R* loci.

96



## 97 **Materials and Methods**

### 98 **Plant material and evaluation of PM development**

99 Fourteen grape accessions were used in this study: eight carrying one *R* locus, six sib lines without  
100 any *R* locus, and two susceptible *V. vinifera* parents. Information about the pedigree of each  
101 accession is provided in **Supplementary Table 1**.

102 PM susceptibility was evaluated with a detached leaf assay as described in Pap *et al.* (2016).  
103 Detached leaves were stained with Coomassie Brilliant Blue R-250 at 5 days post inoculation (dpi)  
104 as in Riaz *et al.* (2013). Visual disease susceptibility scores at 14 dpi were compared using a  
105 Kruskal-Wallis test followed by a post hoc Dunn's test ( $P \leq 0.05$ ).

106 For transcriptional profiling, we followed the inoculation protocol described in Amrine *et al.*  
107 (2015). For each accession three plants were inoculated with *E. necator* C-strain (Jones *et al.*,  
108 2014) and three plants were mock-inoculated. Two leaves from each plant were collected 1 and 5  
109 dpi and immediately frozen in liquid nitrogen. Leaves from an individual plant were pooled  
110 together and constitute a biological replicate. Three biological replications were obtained for each  
111 treatment.

### 112 **RNA extraction, library preparation, and sequencing**

113 RNA extraction and library preparation were performed as in Amrine *et al.* (2015). cDNA libraries  
114 were sequenced using Illumina HiSeq2500 and HiSeq4000 sequencers (DNA Technologies Core,  
115 University of California, Davis, CA, USA) as 50-bp single-end reads (**Supplementary Table 2**).  
116 Sequencing reads of the accessions e6-23 (*Run1.2b*<sup>+</sup>) and 08391-29 (*Run2.2*<sup>+</sup>) were retrieved from  
117 the NCBI BioProject PRJNA780568.

### 118 **Reconstruction of accession-specific reference transcriptomes**

119 For each accession, we constructed a reference transcriptome composed of a diploid synthetic  
120 transcriptome and *de novo* assembled transcripts. The diploid synthetic transcriptome was  
121 reconstructed using sequence variant information. First, adapter sequences were removed and  
122 RNA-seq reads were filtered based on their quality using Trimmomatic v.0.36 (Bolger *et al.*, 2014)  
123 and these settings: LEADING:3 TRAILING:3 SLIDINGWINDOW:10:20 MINLEN:20. Quality-  
124 trimmed reads of the 12 samples from each accession were concatenated into a single file and

125 mapped onto a combined reference genome composed of *V. vinifera* PN40024 V1 (Jaillon *et al.*,  
126 2007) and *E. necator* C-strain genome (Jones *et al.*, 2014) following the STAR 2-pass mapping  
127 protocol (v.2.5.3a; Dobin *et al.*, 2013; Engström *et al.*, 2013). PCR and optical duplicates were  
128 removed with Picard tools (v.2.0.1 <http://broadinstitute.github.io/picard/>), and reads were split into  
129 exon segments using SplitNCigarReads from GATK v.3.5-0-g36282e4 (McKenna *et al.*, 2010).  
130 GATK HaplotypeCaller was used to call sequence variants with the following parameters: -ploidy  
131 2 -stand\_call\_conf 20.0 -stand\_emit\_conf 20.0 -dontUseSoftClippedBases. Variants were filtered  
132 using GATK VariantFiltration with these settings: -window 35 -cluster 3 -filterName FS -filter  
133 "FS > 30.0" -filterName QD -filter "QD < 2.0". Variants passing all filters were selected using  
134 GATK SelectVariants with "--excludeFiltered" parameter. On average,  $265,900 \pm 39,570$  variants  
135 were detected per genotype (**Supplementary Table 3**). Variants in grape protein-coding regions  
136 were extracted using bedtools intersect v.2.19.1 (Quinlan, 2014). Two separate genomes were  
137 reconstructed for each genotype using the vcf-consensus tool from vcftools (Danecek *et al.*, 2011).  
138 The first genome was reconstructed by incorporating both homozygous and heterozygous  
139 alternative 1 (ALT1) variants relative to the PN40024 genome, while the second genome was  
140 reconstructed using both homozygous and heterozygous alternative 2 (ALT2) variants. A new  
141 annotation file was created for each genome from its corresponding variant information. CDS were  
142 extracted using gffread from Cufflinks v.2.2.1 (Trapnell *et al.*, 2010).

143 For each genotype, quality-trimmed reads were mapped onto their respective diploid synthetic  
144 grape transcriptome and *E. necator* C-strain CDS (Jones *et al.*, 2014) using Bowtie2 v.2.3.4.1  
145 (Langmead and Salzberg, 2012) and the parameters --end-to-end --sensitive --un. For each grape  
146 accession, *de novo* assembly was performed using unmapped reads from the 12 RNA-seq libraries  
147 and TRINITY v.2.4.0 (Grabherr *et al.*, 2011). A total of 509,960 sequences were reconstructed,  
148 corresponding to  $36,426 \pm 2,585$  sequences per accession (**Supplementary Table 4**). To reduce  
149 sequence redundancy, reconstructed transcripts from all 14 genotypes were clustered using CD-  
150 HIT-EST v.4.6.8 (Li and Godzik, 2006) and an identity threshold of 90%. The longest  
151 representative sequence of each of the 98,340 transcript clusters was used as input for  
152 TransDecoder v.3.0.1 (<https://github.com/TransDecoder/TransDecoder>). For the 2,174 transcripts  
153 with an open reading frame protein containing a start and a stop codon, the longest CDS was  
154 selected. CDS redundancy was reduced by clustering using CD-HIT-EST v.4.6.8 (Li and Godzik,  
155 2006), with coverage and identity thresholds of 100%. In total, 2,070 CDS were retained

156 **(Supplementary Data 1)**. Taxonomic analysis of the predicted proteins was performed using  
157 Megan v.6.12.5 (Huson *et al.*, 2016) with default parameters after aligning predicted peptides  
158 against the RefSeq protein database (<ftp://ftp.ncbi.nlm.nih.gov/refseq>, retrieved 17 January 2017).  
159 The 103 peptides assigned to proteobacteria, opisthokonts, and viruses were considered microbial  
160 contaminants; the remaining 1,967 peptides were assigned to grape **(Supplementary Table 5)**.

161 To evaluate the effect of the reference transcriptome on the mapping rate (*i.e.* the percentage of  
162 RNA-seq reads aligning onto the reference transcriptome), quality-trimmed RNA-seq reads were  
163 aligned onto two reference transcriptomes: (i) the combined protein-coding sequences of *V.*  
164 *vinifera* PN40024 V1 (Jaillon *et al.*, 2007) and *E. necator* C-strain (Jones *et al.*, 2014), (ii) the  
165 combined accession-specific diploid synthetic grape transcriptome, the *de novo* assembled CDS,  
166 and *E. necator* C-strain CDS (Jones *et al.*, 2014), using Bowtie2 v.2.3.4.1 (Langmead and  
167 Salzberg, 2012) and the parameters --end-to-end --sensitive --un. For each accession, the  
168 difference of mapping rates between the two reference transcriptomes were tested using Kruskal-  
169 Wallis test followed by post hoc Dunn's test ( $P \leq 0.05$ ).

## 170 **Gene expression analysis**

171 Transcript abundance was assessed using Salmon v.1.5.1 (Patro *et al.*, 2017) and these parameters:  
172 --gcBias --seqBias --validateMappings. For each accession, a transcriptome index file was built  
173 using the accession's diploid synthetic transcriptome combined with the *de novo* assembled  
174 transcripts and the *E. necator* C-strain transcriptome, PN40024 V1 and *E. necator* C-strain  
175 genomes as decoys, and a k-mer size of 13. Read counts were computed using the R package  
176 tximport v.1.20.0 (Soneson *et al.*, 2015). Read counts of the two haplotypes of each gene locus of  
177 the diploid synthetic transcriptome were combined. Read-count normalization of the grape  
178 transcripts and statistical testing of differential expression were performed using DESeq2 v.1.16.1  
179 (Love *et al.*, 2014). The sample 14305-001\_H\_5dpi\_1 was removed from the RNA-seq analysis  
180 because of its low mapping rate **(Supplementary Table 2)**.

## 181 **Functional annotation of the defense-related genes**

182 To determine the defense mechanisms triggered by the presence of *E. necator*, we refined the  
183 functional annotation of the grape predicted proteins involved in the following processes: pathogen  
184 recognition by receptor-like kinases (RLKs) and intracellular receptors (NLRs), ROS production

185 and scavenging, nitric oxide (NO) production, calcium oscillations, MAPK cascade, salicylic acid  
186 (SA), jasmonic acid (JA), ethylene (ET), and abscisic acid (ABA) signaling, pathogenesis-related  
187 (PR) protein and phytoalexin biosynthesis, and cell wall reinforcement. Functional annotation of  
188 the grape predicted proteins was assigned based on sequence homology with *Arabidopsis thaliana*  
189 predicted proteins involved in the aforementioned functional categories and protein domain  
190 composition. Grape proteins were aligned onto *A. thaliana* proteins  
191 (Araport11\_genes.201606.pep.fasta; <https://www.arabidopsis.org/download/index.jsp>) using  
192 BLASTP v.2.6.0. Alignments with an identity greater than 30% and a reciprocal reference:query  
193 coverage between 75% and 125% were kept. For each grape protein, the alignment with the highest  
194 product of identity, query coverage, and reference coverage was selected to determine a  
195 homologous protein in *A. thaliana*. We verified that each grape protein and its assigned *A. thaliana*  
196 had a similar domain composition. Grape and *Arabidopsis thaliana* predicted proteins were  
197 scanned with hmmsearch from HMMER v.3.3.1 (<http://hmmmer.org/>) and the Pfam-A Hidden  
198 Markov Models (HMM) database (El-Gebali *et al.*, 2019; downloaded on 29 January 2021).  
199 Protein domains with an independent E-value less than 1.0 and an alignment covering at least 50%  
200 of the HMM were selected. Grape predicted proteins having a similar domain composition than  
201 their *A. thaliana* homologues were retained. The functional annotation of defense-related genes  
202 used in this study can be found in **Supplementary Table 6**.

203

## 204 **Results**

### 205 **Powdery mildew resistance loci exhibit different intensity and timing of response to *E.*** 206 ***necator***

207 PM disease severity was evaluated on detached leaves from fourteen grape accessions, including  
208 twelve interspecific accessions, and two PM-susceptible *V. vinifera*, Malaga Rosada and F2-35  
209 (**Table 1, Supplementary Table 1**). The twelve interspecific hybrids included four pairs of  
210 siblings derived from backcrosses with one of the following resistant accessions: *V. romanetii*  
211 C166-043 (*Ren4D*<sup>+</sup>), *V. romanetii* C166-026 (*Ren4U*<sup>+</sup>), *M. rotundifolia* G52 (*Run1*<sup>+</sup>), *M.*  
212 *rotundifolia* Trayshed (*Run2.2*<sup>+</sup>) (Ramming *et al.*, 2011; Riaz *et al.*, 2011; Feechan *et al.*, 2013).  
213 The four remaining interspecific accessions were 09390-023 (*Ren2*<sup>+</sup>), 07712-06 (*Ren3*<sup>+</sup>), e6-23

214 (*Run1.2b*<sup>+</sup>), and 09705-45 (*Run2.1*<sup>+</sup>); these inherited PM resistance from *V. cinerea* B9, the  
 215 interspecific hybrid Villard blanc, *M. rotundifolia* Trayshed, and *M. rotundifolia* Magnolia,  
 216 respectively (Dalbó *et al.*, 2001; Riaz *et al.*, 2011; Zyprian *et al.*, 2016).

217

218 **Table 1:** Description of the fourteen grape genotypes used in this study. Details about their  
 219 pedigree are provided in **Supplementary Table 1**. Siblings deriving from the same cross are  
 220 indicated with an asterisk. BC, backcross.

| Accession name | <i>R</i> locus              | <i>R</i> locus origin           | BC level | % <i>V. vinifera</i> |
|----------------|-----------------------------|---------------------------------|----------|----------------------|
| 09390-023      | <i>Ren2</i> <sup>+</sup>    | <i>V. cinerea</i> B9            | F1       | 50                   |
| 07712-06       | <i>Ren3</i> <sup>+</sup>    | Villard blanc                   | Complex  | 78                   |
| 13353-55*      | <i>Ren4D</i> <sup>+</sup>   | <i>V. romanetii</i> C166-043    | BC2      | 87.5                 |
| 13353-33*      | <i>Ren4D</i> <sup>-</sup>   | -                               | BC2      | 87.5                 |
| 14305-002*     | <i>Ren4U</i> <sup>+</sup>   | <i>V. romanetii</i> C166-026    | Complex  | 89.1                 |
| 14305-001*     | <i>Ren4U</i> <sup>-</sup>   | -                               | Complex  | 89.1                 |
| 14375-059*     | <i>Run1</i> <sup>+</sup>    | <i>M. rotundifolia</i> G52      | BC4      | 96.9                 |
| 14375-063*     | <i>Run1</i> <sup>-</sup>    | -                               | BC4      | 96.9                 |
| e6-23          | <i>Run1.2b</i> <sup>+</sup> | <i>M. rotundifolia</i> Trayshed | BC2      | 87.5                 |
| 09705-45       | <i>Run2.1</i> <sup>+</sup>  | <i>M. rotundifolia</i> Magnolia | BC2      | 87.5                 |
| 08391-029*     | <i>Run2.2</i> <sup>+</sup>  | <i>M. rotundifolia</i> Trayshed | BC3      | 93.8                 |
| 08391-028*     | <i>Run2.2</i> <sup>-</sup>  | -                               | BC3      | 93.8                 |
| F2-35          | -                           | -                               | -        | 100                  |
| Malaga Rosada  | -                           | -                               | -        | 100                  |

221

222 At 5 dpi, extensive hyphal growth and conidiophores were observed on leaves from the two PM-  
 223 susceptible *V. vinifera* cultivars, F2-35 and Malaga Rosada, and all the sib lines devoid of PM  
 224 resistance loci (**Figure 1A**). Little or no hyphal growth was visible on the leaves of the accessions  
 225 carrying *Ren4D*, *Ren4U*, *Run1*, and *Run1.2b* loci. Some secondary and tertiary hyphae were found  
 226 on *Ren2*<sup>+</sup>, *Ren3*<sup>+</sup>, *Run2.1*<sup>+</sup>, and *Run2.2*<sup>+</sup> genotypes (**Figure 1A**). PM infection was also assessed at  
 227 an advanced disease development stage (14 dpi) using visual scoring (**Supplementary Figure**  
 228 **1A**). Infection rate at 5 and 14 dpi was similar for all genotypes except *Ren2*<sup>+</sup> and *Ren3*<sup>+</sup>, which

229 both had an extensive mycelium growth on their leaves at 14 dpi (Kruskal-Wallis test followed by  
230 post-hoc Dunn's test;  $P \leq 0.05$ ).

231 PM biomass on leaves was estimated by measuring *E. necator* transcript abundance at 5 dpi. As  
232 expected, significantly lower *E. necator* transcript counts were found in genotypes carrying a PM  
233 *R* locus (**Figure 1B,C**). Significant differences in *E. necator* transcripts were also observed  
234 between *Ren2*<sup>+</sup>, *Run2.2*<sup>+</sup>, and the other PM-resistant accessions (Kruskal-Wallis test followed by  
235 post hoc Dunn's test;  $P \leq 0.05$ ). *E. necator* transcript abundance at 5 dpi and PM infection scores  
236 at 14 dpi correlated well ( $R^2 = 0.71$ ; **Supplementary Figure 1B**), which suggests that pathogen  
237 transcript abundance is a reliable measure of PM susceptibility.

238 These results show that all *R* loci confer resistance to PM in *V. vinifera*. However, PM resistance  
239 level varies between *R* loci, suggesting differences in the perception of the pathogen and/or in the  
240 efficiency of the defense responses.



241

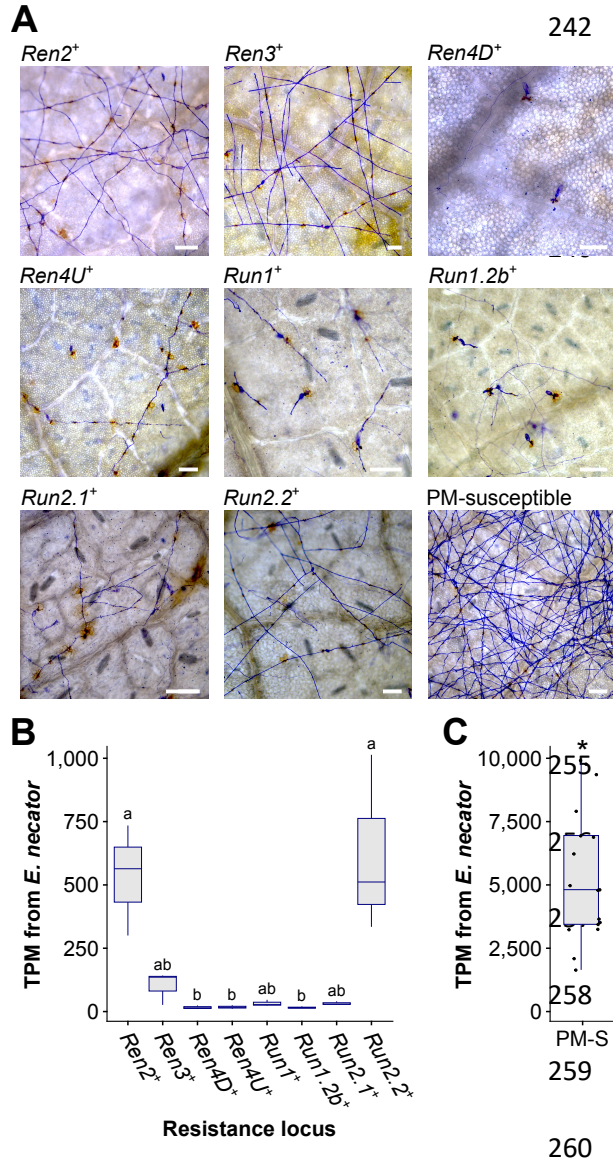

**Figure 1:** Powdery mildew disease development at 5 days post-inoculation. **(A)** Micrographs of detached leaves inoculated with *E. necator*. Scale = 100  $\mu$ m. Total Transcripts per Million (TPM) derived from *E. necator* transcriptome in PM-resistant **(B)** and PM-susceptible (PM-S) accessions **(C)**. Significant differences between PM resistance loci are indicated by different letters (Kruskal-Wallis test followed by post hoc Dunn's test;  $P \leq 0.05$ ). Significant difference between grape accessions with and without a PM resistance locus is indicated by an asterisk (Kruskal-Wallis test,  $P = 4.0 \times 10^{-8}$ ).

261

## 262 Construction of comparable reference transcriptomes

263 To determine if the differences in PM development between *R* loci were associated with  
 264 differences in the defense mechanisms induced, we profiled the leaf transcriptomes of the fourteen  
 265 genotypes at 1 and 5 dpi using RNA-seq. Mock-inoculated samples were collected as controls.  
 266 Because the genotypes have diverse and distant genetic backgrounds, we built comparable  
 267 reference transcriptomes for each genotype by incorporating sequence variant information into the

268 predicted transcriptome of PN40024 and by adding *de novo* assembled transcripts that are not  
269 found among the annotated CDS of PN40024.

270 RNA-seq reads were first used to identify sequence polymorphisms between all sequenced  
271 transcriptomes and the PN40024 reference (Jaillon *et al.*, 2007). On average,  $109,645 \pm 17,463$   
272 single-nucleotide polymorphisms (SNPs) and  $1,208 \pm 119$  short insertion-deletions (INDELs)  
273 were detected in the protein-coding regions of each grape accession (**Figure 2; Supplementary**  
274 **Table 3**). Although the number of homozygous SNPs was quite stable across genotypes ( $35,490$   
275  $\pm 4,667$ ), the number of heterozygous SNPs varied extensively, ranging from 54,154 in *V. vinifera*  
276 cv. Malaga Rosada to 116,032 in the *Ren2*<sup>+</sup> accession (Malaga Rosada x *V. cinerea* B9; **Figure 2**).  
277 Comparison of the SNPs detected in the fourteen leaf transcriptomes compared to *V. vinifera*  
278 PN40024 protein-coding sequences distinguished the *Ren2*<sup>+</sup> accession from the other grape  
279 accessions, likely because it is the only F1 individual in this study (**Table 1; Figure 2**). Siblings  
280 and respective *V. vinifera* parents clustered together confirming the validity of the variant calling  
281 approach (**Figure 2**). Analysis of genetic relatedness also confirmed sibling and parent-offspring  
282 relationships (**Supplementary Figure 2**). Homozygous and heterozygous variants of each grape  
283 genotype were incorporated into the CDS of PN40024 to produce a diploid reference transcriptome  
284 for each genotype (**Figure 3A**).

285



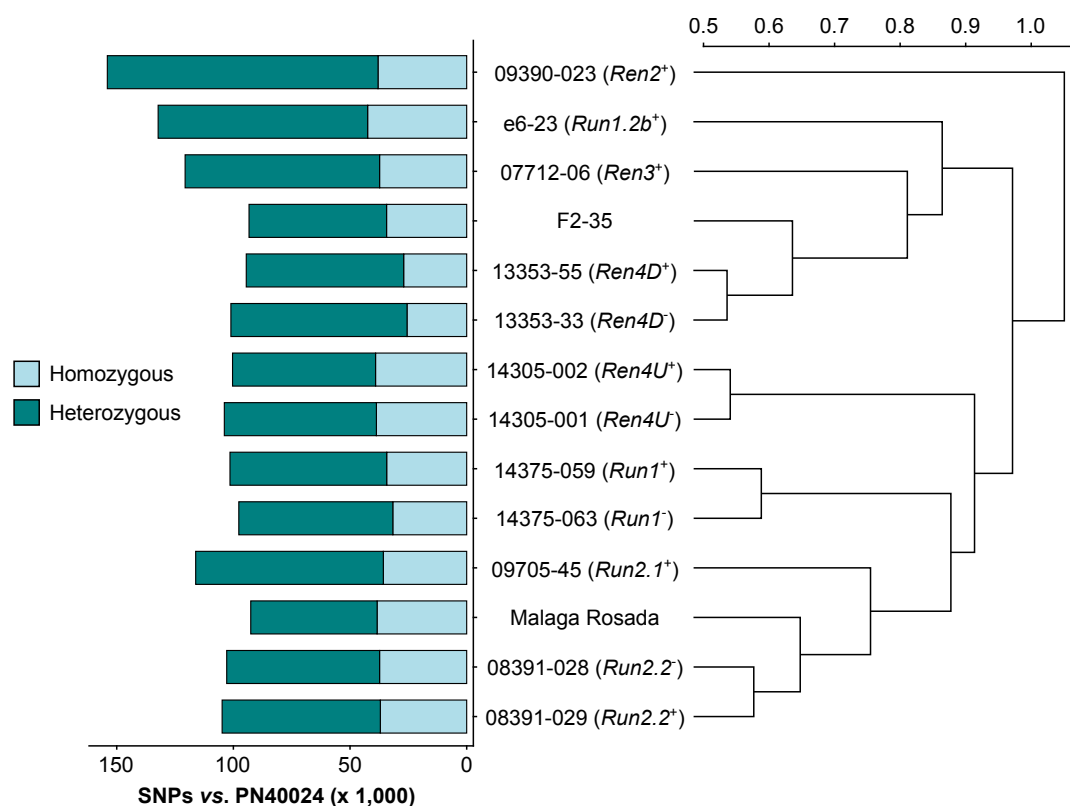

286

287 **Figure 2:** SNPs detected in the leaf transcriptome of the 14 grape accessions compared to the  
288 protein-coding sequences of *Vitis vinifera* PN40024. The Pearson correlation coefficients of the  
289 pairwise SNP comparison were converted into distance coefficients to define the height of the  
290 dendrogram branches.

291

292 The RNA-seq reads that did not align onto their respective diploid transcriptome reference were  
293 *de novo* assembled in order to construct transcripts that are not present in the PN40024  
294 transcriptome (**Figure 3B**). All *de novo* assembled transcripts from the fourteen accessions were  
295 clustered to obtain a non-redundant dataset. After sequence clustering, CDS discovery, and  
296 removal of non-plant sequences, 1,967 non-redundant plant CDS were identified (See methods;  
297 **Supplementary Table 5**). Based on transcript clustering, each grape accession possessed on  
298 average  $1,201 \pm 31$  of the grape *de novo* assembled CDS. As expected, siblings grouped together  
299 based on shared CDS (**Supplementary Figure 3**). Incorporating the sequence polymorphisms and  
300 *de novo* assembled CDS into the reference transcriptome increased the percentage of aligning

301 RNA-seq reads by  $2.5 \pm 0.9\%$  per sample (**Figure 3C**) and likely also increased the mapping  
302 specificity.

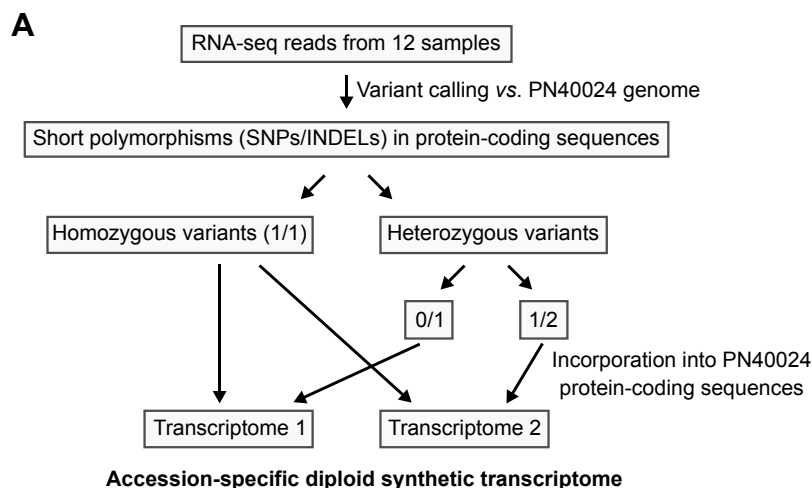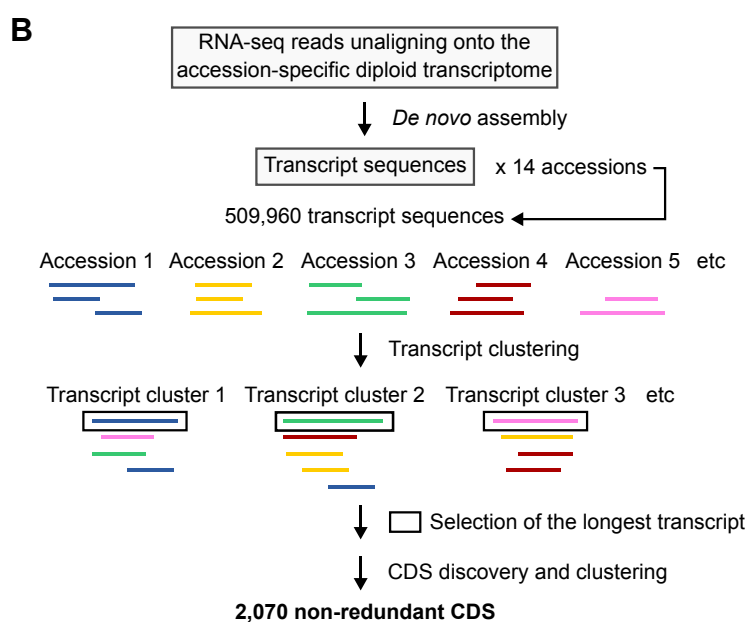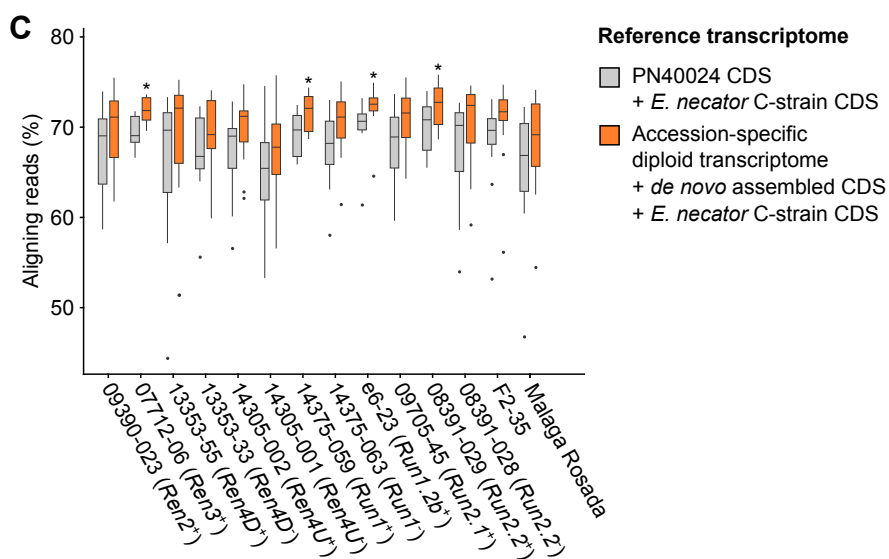

304 **Figure 3:** Adapting the grape transcriptome to each accession enhances the alignment of RNA-  
305 seq reads. Schematic representations of the bioinformatics approaches used to reconstruct the  
306 diploid synthetic transcriptome of each grapevine accession (A) and to cluster the *de novo*  
307 assembled transcripts (B). (C) Effect of the reference transcriptome on the percentage of aligning  
308 reads. For each genotype, difference of mapping rate with the combined transcriptomes of  
309 PN40024 and *E. necator* was tested using a Kruskal-Wallis test. \* indicates  $P$  value  $\leq 0.05$ .

310

### 311 **Annotation of the grape defense-related genes**

312 To determine the defense mechanisms involved in the response to *E. necator*, we refined the  
313 functional annotation of the grape predicted proteins based on protein domain composition and  
314 homology with *Arabidopsis thaliana* predicted proteins. We identified 2,694 grape genes involved  
315 in the following processes: pathogen recognition by receptor-like kinases (RLKs) and intracellular  
316 receptors (NLRs), ROS production and scavenging, nitric oxide (NO) production, calcium  
317 oscillations, MAPK cascade, salicylic acid (SA), jasmonic acid (JA), ethylene (ET), and abscisic  
318 acid (ABA) signaling pathways, pathogenesis-related (PR) protein and phytoalexin biosynthesis,  
319 and cell wall reinforcement (**Table 2; Supplementary Table 6**). These included 22 *de novo*  
320 assembled CDS, including nine NLRs, a glutaredoxin, three pathogenesis-related (PR) protein 14-  
321 like proteins, and three ethylene-responsive transcription factors (ERFs) (**Supplementary Table**  
322 **6**).

323

324 **Table 2:** Number of defense-related genes identified among the predicted proteins of PN40024  
325 CDS and the *de novo* assembled CDS. NLR, nucleotide-binding leucine-rich repeat protein.

| <b>Defense-related functional category</b>             | <b>PN40024 CDS</b> | <b><i>de novo</i> CDS</b> | <b>Total</b> |
|--------------------------------------------------------|--------------------|---------------------------|--------------|
| Receptor-like kinases (RLKs)                           | 450                | 1                         | 451          |
| Nucleotide-binding leucine-rich repeat proteins (NLRs) | 309                | 9                         | 318          |
| Calcium signaling                                      | 109                | 0                         | 109          |
| MAPK signaling                                         | 83                 | 0                         | 83           |
| Reactive oxygen species (ROS) production               | 106                | 0                         | 106          |
| Reactive oxygen species (ROS) scavenging               | 216                | 1                         | 217          |
| Nitric oxide (NO) production                           | 8                  | 0                         | 8            |

|                                           |              |           |              |
|-------------------------------------------|--------------|-----------|--------------|
| Salicylic acid-mediated signaling pathway | 26           | 0         | 26           |
| Jasmonic acid-mediated signaling pathway  | 113          | 1         | 114          |
| Ethylene-mediated signaling pathway       | 168          | 3         | 171          |
| Abscisic acid-mediated signaling pathway  | 111          | 0         | 111          |
| Pathogenesis-related (PR) proteins        | 374          | 3         | 377          |
| Phytoalexin biosynthesis                  | 339          | 1         | 340          |
| Cell wall reinforcement                   | 260          | 3         | 263          |
| <b>Total</b>                              | <b>2,672</b> | <b>22</b> | <b>2,694</b> |

326

### 327 **Assessment of the transcriptional modulations associated with powdery mildew resistance**

328 PM- and mock-inoculated leaf transcriptomes were compared at 1 and 5 dpi to identify the defense-  
 329 related genes that were differentially expressed in response to *E. necator* (**Figure 4**;  
 330 **Supplementary Table 7**). In the PM-resistant vines *Ren3*<sup>+</sup>, *Ren4D*<sup>+</sup>, *Ren4U*<sup>+</sup>, and *Run1.2b*<sup>+</sup>, up-  
 331 and down-regulated genes were more numerous at 1 dpi relative to 5 dpi, while only few  
 332 differentially expressed genes (DEGs) were detected in *Run2.1*<sup>+</sup> leaves. The opposite pattern was  
 333 observed in the *Run2.2*<sup>+</sup> accession as well as four of the five PM-susceptible plants. These results  
 334 suggest that disease resistance is mostly associated with an early transcriptional reprogramming.

335 To determine the transcriptional modulations associated with PM resistance, defense-related  
 336 DEGs in PM-resistant accessions were compared with the ones found in PM-susceptible  
 337 individuals at each time point. On average, 39.7 % ± 16.6 % of the up-regulated genes and 52.7 %  
 338 ± 19.0 % of the down-regulated genes detected in PM-resistant accessions were not found in PM-  
 339 susceptible plants (**Figure 4**). PM resistance-associated DEGs were more numerous at 1 dpi  
 340 compared to 5 dpi in all PM-resistant genotypes except the *Ren4U*<sup>+</sup> vine. This supports the  
 341 hypothesis that an early transcriptional reprogramming caused by the prompt perception of *E.*  
 342 *necator* by intracellular NLR is crucial for PM resistance. However, the PM-resistant accessions  
 343 exhibited different amounts of defense-related DEGs in response to *E. necator* at 1 dpi. The highest  
 344 number of up-regulated genes associated with disease resistance at 1 dpi was detected in *Ren3*<sup>+</sup>,  
 345 *Ren4D*<sup>+</sup>, and *Ren4U*<sup>+</sup> vines (199, 193, and 167 genes, respectively), while a lower number of up-  
 346 regulated genes was found in *Ren2*<sup>+</sup>, *Run1*<sup>+</sup>, *Run1.2b*<sup>+</sup>, *Run2.2*<sup>+</sup> leaves (93, 59, 70, and 42 genes,  
 347 respectively). The *Run2.1*<sup>+</sup> accession was the PM-resistant with the fewest up-regulated genes  
 348 associated with PM resistance, with only 7 and 14 genes at 1 and 5 dpi, respectively. Similar  
 349 patterns were observed for the down-regulated genes detected only in PM-resistant vines.

350

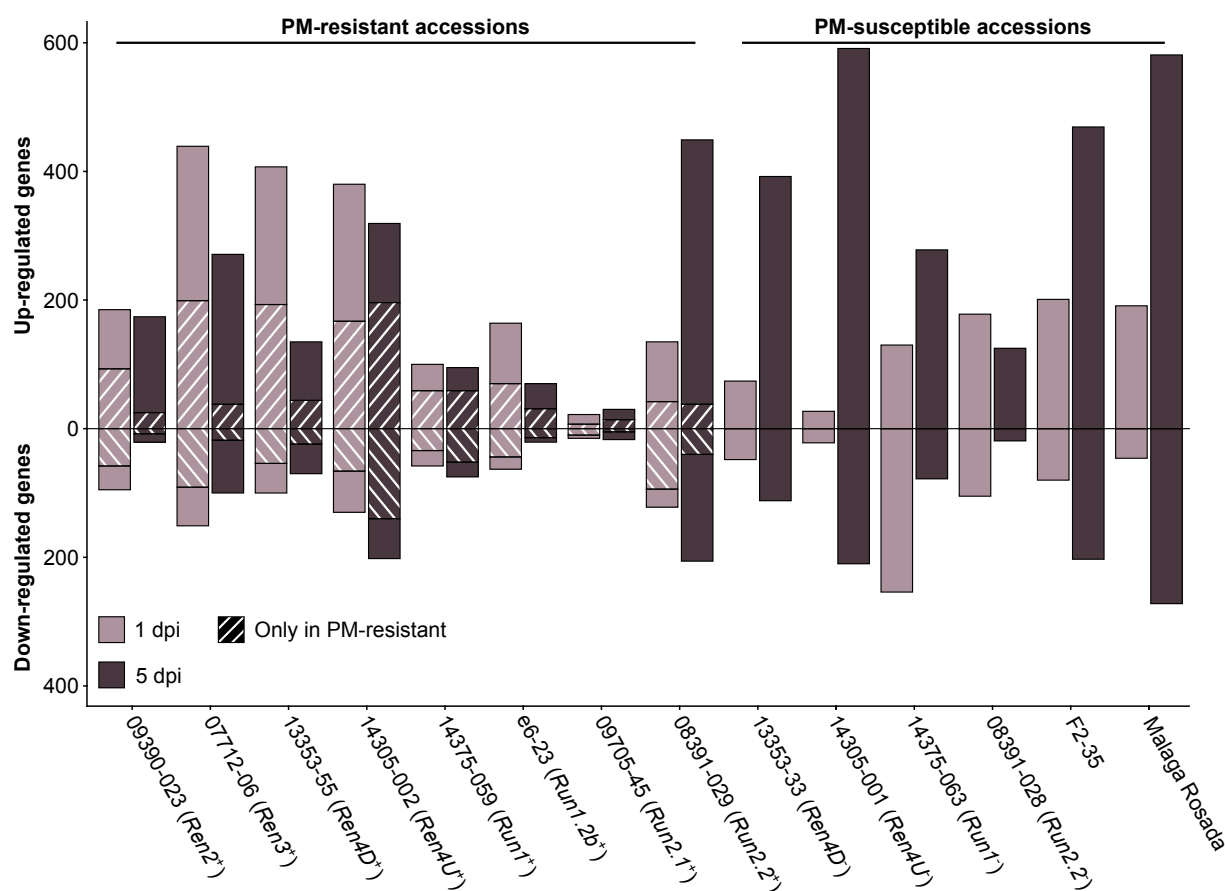

351

352 **Figure 4:** Defense-related genes differentially expressed in response to *E. necator* at 1 and 5 dpi.  
 353 The genes uniquely differentially expressed by *E. necator* in the grape accessions possessing a *R*  
 354 locus were identified by comparing the up- and down-regulated genes in PM-resistant leaves with  
 355 the ones detected in PM-susceptible vines at each time point.

356

357 **Overlap in transcriptional modulation associated with powdery mildew resistance between**  
 358 ***R* loci**

359 PM resistance-associated DEGs were compared across PM-resistant accessions to evaluate the  
 360 overlap in defense responses between the different PM resistance loci (**Figure 5 & 6;**  
 361 **Supplementary Figures 4-7**). On average, the *R* loci shared  $52.9 \pm 10.4$  % and  $38.0 \pm 13.6$  % of  
 362 their defense-related DEGs associated with disease resistance with at least another *R* locus at 1 and  
 363 5 dpi, respectively. However, the overlap of PM resistance-associated DEGs between two *R* loci

364 was limited ( $8.4 \pm 10.0$  %). The largest pairwise overlaps were found among the up-regulated  
365 genes at 1 dpi between the *Ren3*<sup>+</sup>, *Ren4D*<sup>+</sup>, and *Ren4U*<sup>+</sup> genotypes (**Figure 5A, Supplementary**  
366 **Figure 4**). The *Ren3*<sup>+</sup> and *Ren4D*<sup>+</sup> accessions shared 64 up-regulated genes, while 49 and 44  
367 defense-related genes were up-regulated in both *Ren3*<sup>+</sup> and *Ren4U*<sup>+</sup> genotypes, and both *Ren4D*<sup>+</sup>  
368 and *Ren4U*<sup>+</sup> vines, respectively. The overlap of up-regulated genes between *Ren3*<sup>+</sup> and *Ren4D*<sup>+</sup>  
369 accessions encompassed the largest number of extra- and intracellular receptor genes (15 RLK and  
370 10 NLR genes), MAPK-signaling genes (7), and phytoalexin biosynthesis-related genes (11)  
371 including six stilbene synthase genes (**Figure 5A**). Eight genes involved in ROS production were  
372 found up-regulated in several *R* loci: a copper amine oxidase, three respiratory burst oxidase  
373 homolog (RBOH), and four class III cell wall peroxidase (Prx) genes. Regarding ROS scavenging,  
374 two catalase genes were up-regulated in both *Ren3*<sup>+</sup>, *Ren4D*<sup>+</sup>, and *Ren4U*<sup>+</sup> leaves, as well as seven  
375 glutathione *S*-transferase genes in *Ren3*<sup>+</sup> and *Ren4U*<sup>+</sup> accessions. Some hormone-mediated  
376 signaling genes were also found up-regulated genes in several *R* loci at 1 dpi, including one gene  
377 involved in SA signaling, 12 genes in JA signaling, 13 genes in ET signaling, and 11 genes in  
378 ABA signaling. The shared JA-signaling genes encompassed 8 genes involved in JA biosynthesis,  
379 including an allene oxide synthetase (AOS) gene (VIT\_18s0001g11630) that was more highly  
380 expressed in *Ren3*<sup>+</sup>, *Ren4D*<sup>+</sup>, *Ren4U*<sup>+</sup>, *Run1.2b*<sup>+</sup> leaves in response to *E. necator*. The gene  
381 *VviJAZ4* (VIT\_09s0002g00890) encoding a jasmonate-ZIM-domain protein was also up-regulated  
382 by the same PM resistance loci. Ectopic expression of *VqJAZ4* from *V. quinquangularis* was  
383 showed to enhance resistance to PM in *A. thaliana*, suggesting a role of the jasmonate-ZIM-  
384 domain protein in grape PM resistance (Zhang *et al.*, 2019). Furthermore, *VviMYC2*  
385 (VIT\_02s0012g01320) was up-regulated in *Ren2*<sup>+</sup>, *Ren3*<sup>+</sup>, *Ren4D*<sup>+</sup>, and *Ren4U*<sup>+</sup> accessions at 1  
386 dpi but not in any genotype possessing a *R* locus from *M. rotundifolia*. The same pattern was  
387 observed for *VviJAR1* (VIT\_15s0046g01280) which was up-regulated only in *Ren3*<sup>+</sup>, *Ren4D*<sup>+</sup>, and  
388 *Ren4U*<sup>+</sup> accessions. In *A. thaliana*, JAR1 encodes a jasmonate-amido synthetase that catalyzes the  
389 formation of the biologically active jasmonyl-isoleucine (JA-Ile) conjugate, while MYC2 is a basic  
390 helix-loop-helix (bHLH) transcription factor that is involved in JA signaling but also in ABA- and  
391 SA-mediated signaling (Abe *et al.*, 2003; Dombrecht *et al.*, 2007; Gautam *et al.*, 2021; Staswick  
392 and Tiryaki, 2004). Regarding cell wall reinforcement, a dirigent protein-encoding gene  
393 (VIT\_06s0004g01020) was up-regulated in *Ren4U*<sup>+</sup>, *Run1*<sup>+</sup> and *Run2.2*<sup>+</sup> genotypes at 1 dpi.  
394 Dirigent proteins participate in the biosynthesis of lignans and lignin which both play a role in

395 plant defense. Lignans inhibit microbe-derived degradative enzymes while lignin accumulation in  
396 the plant cell wall forms a physical barrier against pathogens (Paniagua *et al.*, 2017). In addition,  
397 the callose synthase genes *VviCals1* and *VviCals3* (Yu *et al.*, 2016) were up-regulated in only  
398 *Ren4D*<sup>+</sup> and *Ren4U*<sup>+</sup> accessions at 1 dpi and 5 dpi, respectively (**Figures 5A & 6A,**  
399 **Supplementary Figures 4 & 6**). These results support previous observations which suggested that  
400 *Ren4*-mediated resistance relies on the encasement of the pathogen haustorium in callose in  
401 addition to PCD of the infected cells (Qiu *et al.*, 2015).

402 Regarding the down-regulated genes associated with PM resistance at 1 dpi, *Ren3*<sup>+</sup> and *Ren4U*<sup>+</sup>  
403 accessions shared the highest number of genes with a lower gene expression in response to *E.*  
404 *necator* (20), followed by the *Ren2*<sup>+</sup> and *Ren4D*<sup>+</sup> vines (19), the *Run1.2b*<sup>+</sup> and *Run2.2*<sup>+</sup> plants (18),  
405 and the *Ren4D*<sup>+</sup> and *Ren4U*<sup>+</sup> genotypes (17; **Figure 5B**). The overlap in down-regulated genes  
406 between the *Ren3*<sup>+</sup> and *Ren4U*<sup>+</sup> accessions comprised 7 RLK genes, 2 Prx genes, and 2 cellulose  
407 synthase-like genes. Both *Ren2*<sup>+</sup> and *Ren4D*<sup>+</sup> leaves exhibited a lower gene expression of 8 ROS  
408 scavenging-related genes in response to *E. necator* at 1 dpi. Four fatty acid desaturase genes  
409 involved in JA biosynthesis were down-regulated in the *Ren4D*<sup>+</sup> and *Ren4U*<sup>+</sup> genotypes, and an  
410 ERF gene was down-regulated in *Ren3*<sup>+</sup>, *Ren4D*<sup>+</sup> and *Ren4U*<sup>+</sup> plants.

411 At 5 dpi, the highest overlap of DEGs associated with PM resistance was found between *Ren4U*<sup>+</sup>  
412 and *Run1*<sup>+</sup> genotypes, with 31 and 25 common up- and down-regulated genes, respectively (**Figure**  
413 **6**). The shared up-regulated genes between *Ren4U*<sup>+</sup> and *Run1*<sup>+</sup> accessions encompassed 5 RLKs  
414 and 17 NLRs, 3 MAPKK genes, 3 genes involved in ABA signal transduction, and the gene  
415 encoding the exoribonuclease 4 (XRN4/EIN5; VIT\_14s0030g01580) involved in ethylene  
416 response (**Figure 6A**). Five additional ethylene-signaling genes were found up-regulated in *Ren2*<sup>+</sup>  
417 and *Ren4D*<sup>+</sup> accessions at 5 dpi: a 1-aminocyclopropane-1-carboxylate synthase (ACS) gene  
418 (VIT\_02s0025g00360) and four ERF genes. In contrast, the 25 down-regulated genes shared by  
419 *Ren4U*<sup>+</sup> and *Run1*<sup>+</sup> genotypes included six genes associated with ROS production (1) and  
420 scavenging (6), and 10 genes involved in the biosynthesis of anthocyanins and condensed tannins  
421 (**Figure 6B**).

422



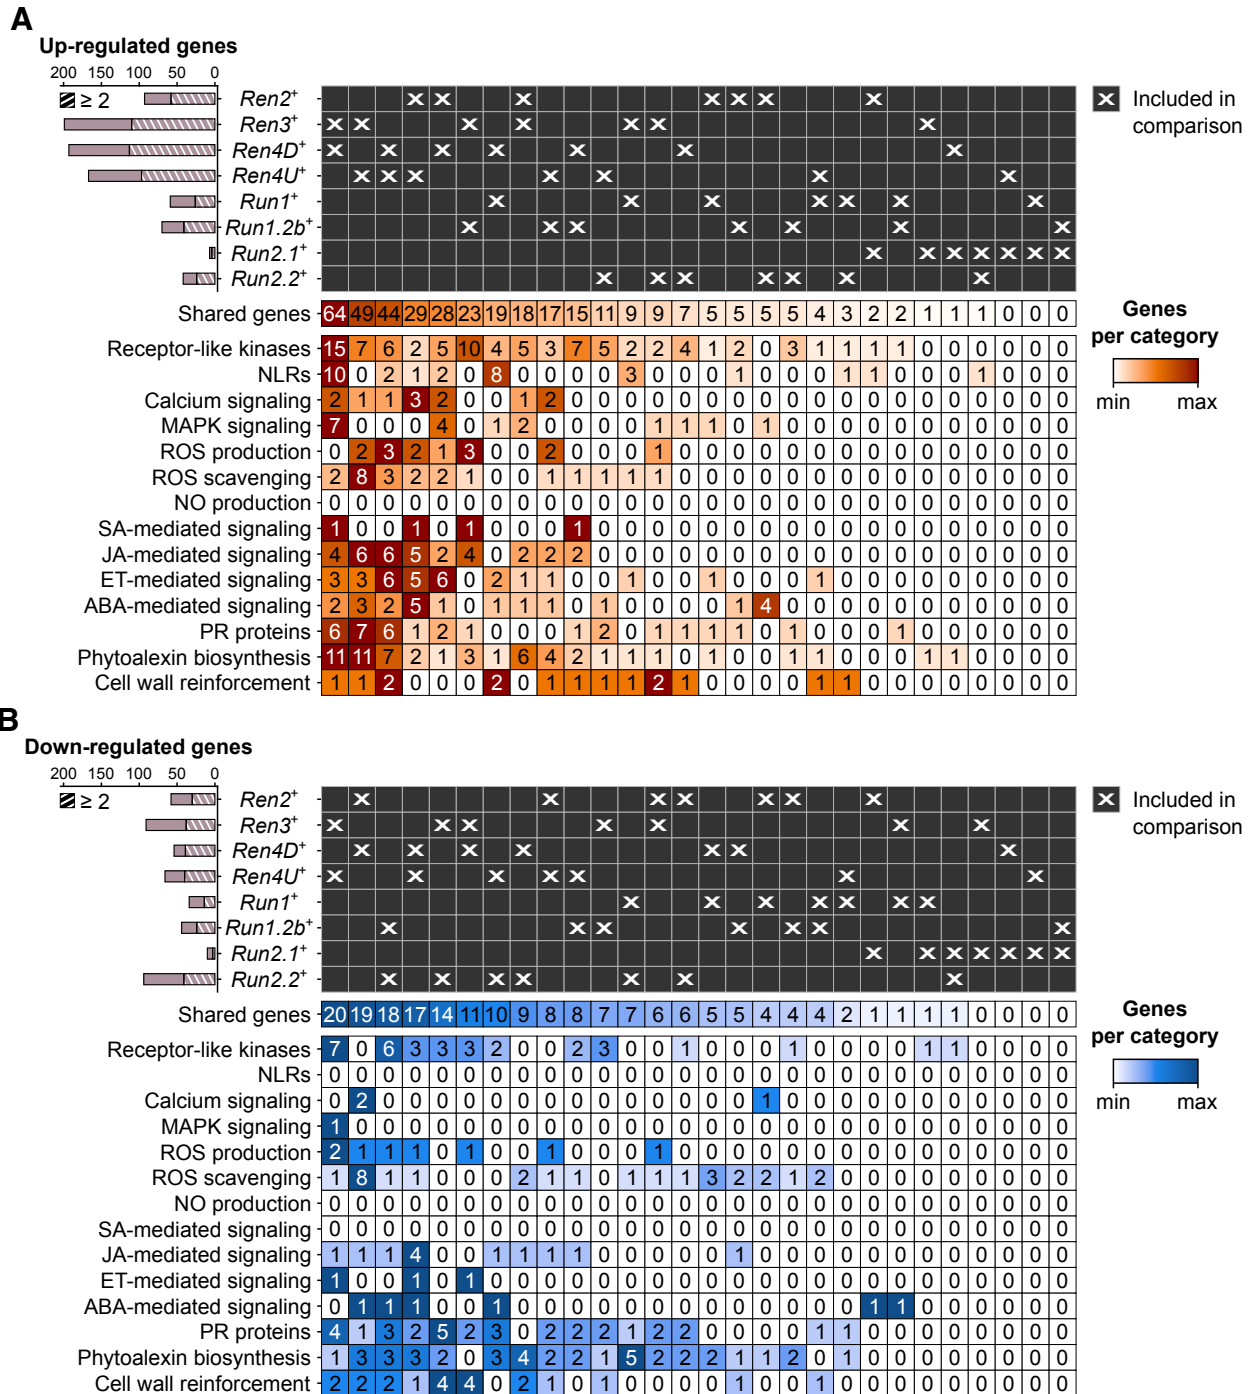

423

424 **Figure 5:** Pairwise comparison of the defense-related genes found up- and down-regulated in  
 425 response to *E. necator* at 1 dpi in only the eight *R* loci. Striped bar plots depict the number of  
 426 defense-related genes differentially expressed in at least two *R* loci.

427

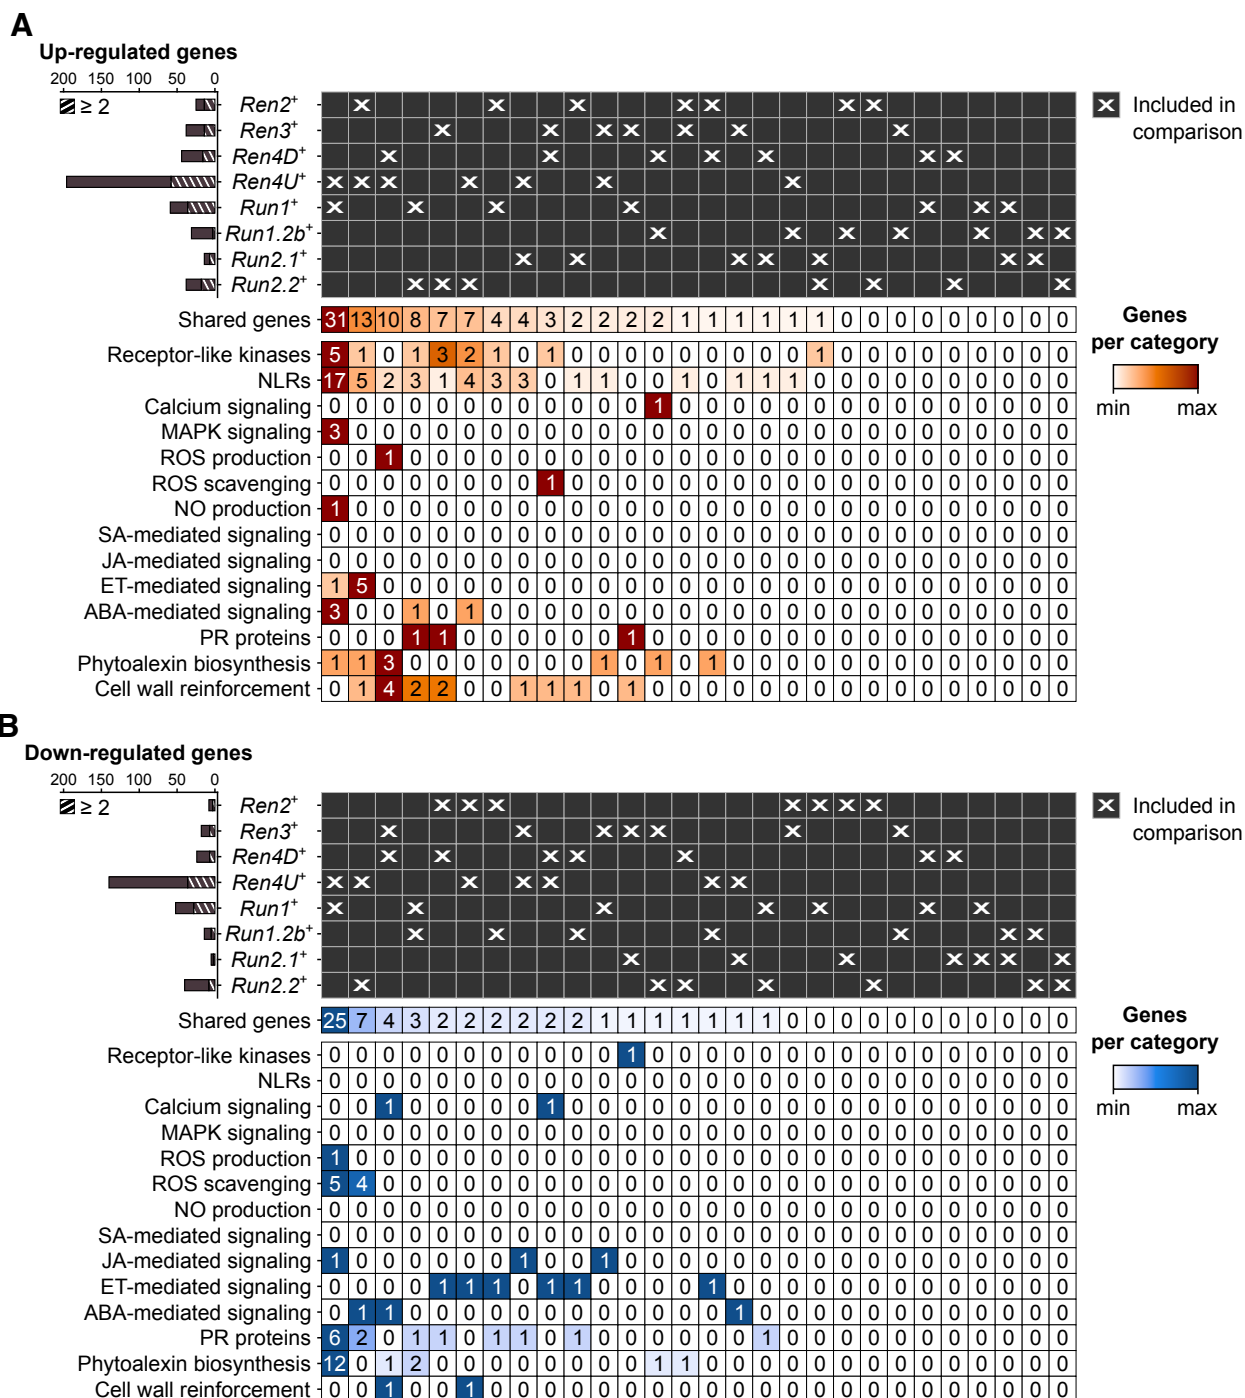

428  
429 **Figure 6:** Pairwise comparison of the defense-associated genes found up- and down-regulated in  
430 response to *E. necator* at 5 dpi in only the eight accessions carrying a *R* locus. Striped bar plots  
431 represent the defense-related genes differentially expressed in at least two *R* loci.

### 433 **Resistance locus-specific transcriptional modulations in response to *E. necator***

434 Nearly half of the PM resistance-associated DEGs were found in only one PM resistance locus  
435 ( $47.1 \pm 10.4\%$  and  $62.0 \pm 13.6\%$  at 1 and 5 dpi, respectively). Although the *Ren3*<sup>+</sup>, *Ren4D*<sup>+</sup>, and  
436 *Ren4U*<sup>+</sup> genotypes exhibited the greatest overlap of PM resistance-associated up-regulated genes  
437 at 1 dpi, the three PM resistance loci also had the highest number of genes (89, 80, and 70 genes,  
438 respectively) that were up-regulated in a *R* locus-specific manner (**Figure 7**). Regarding the down-  
439 regulated genes at 1 dpi, *Ren3*<sup>+</sup> and *Run1.2b*<sup>+</sup> plants had the most numerous *R* locus-specific ones  
440 (53 genes each). At 5 dpi, the largest number of *R* locus-specific DEGs was identified in *Ren4U*<sup>+</sup>  
441 leaves, with 138 up-regulated and 104 down-regulated genes.

442 Differences in defense-related categories among the *R* locus-specific DEGs could be observed  
443 between the eight *R* loci and the two time points (**Figure 7**). The *Ren3*<sup>+</sup> accession exhibited the  
444 greatest number of *R* locus-specific DEGs encoding intracellular receptors (RLKs) at 1 dpi, with  
445 24 up-regulated and 19 down-regulated genes. In contrast, the presence of *E. necator* led to the  
446 up-regulation of 28 RLK and 44 NLR genes in only the *Ren4U*<sup>+</sup> leaves at 5 dpi. In addition to the  
447 intra- and extracellular receptors, the *R* locus-specific DEGs encompassed several PR protein  
448 genes as well as genes involved in phytoalexin biosynthesis and cell wall rearrangement.  
449 Regarding the PR protein genes, the *Ren4U*<sup>+</sup> accession showed the largest number of up-regulated  
450 genes at 1 dpi (11) but also the most numerous down-regulated genes at 5 dpi (28). The *Ren3*<sup>+</sup>  
451 genotype had also some *R* locus-specific DEGs encoding PR proteins at 1 dpi (7 up-regulated and  
452 9 down-regulated genes), while the *Ren4D*<sup>+</sup> and *Run1.2b*<sup>+</sup> vines had six and five specific up-  
453 regulated ones at 5 dpi, respectively. The PM resistance locus-specific DEGs encoding PR proteins  
454 included PR1-like proteins, beta-1,3-glucanases (PR2), basic chitinases (PR3), thaumatin-like  
455 proteins (PR5), subtilisin-like endoproteases (PR7), chitinases type I (PR11) and III (PR8), Bet  
456 v 1 homologs (PR10), lipid-transfer proteins (PR14), and germin-like proteins (PR16). PM  
457 resistance loci also exhibited differences in *R* locus-specific DEGs involved in the biosynthesis of  
458 antimicrobial compounds. Like the PR proteins, the *Ren4U*<sup>+</sup> accession had the highest number of  
459 genes that were up-regulated at 1 dpi (14) and down-regulated at 5 dpi (24) in a PM resistance  
460 locus-specific way. In addition to the *Ren4U*<sup>+</sup> accession, several phytoalexin biosynthesis-related  
461 genes were found up-regulated only in the *Ren3*<sup>+</sup>, *Ren4D*<sup>+</sup>, and *Run1.2b*<sup>+</sup> genotypes at both time  
462 points. In contrast, 21 genes involved in the biosynthesis of phytoalexins were found down-

463 regulated specifically in the *Run2.2*<sup>+</sup> plants at 1 dpi, including 18 genes from the phenylpropanoid  
464 biosynthesis pathway. The *Ren3*<sup>+</sup>-specific up-regulated genes at 1 dpi comprised three alkaloid-  
465 related genes (berberine bridge enzymes), three genes from the phenylpropanoid biosynthesis  
466 pathway: two cinnamate 4-hydroxylases (C4H) and one 4-coumarate--CoA ligase (4CL), and two  
467 stilbene synthases. Genes involved in the biosynthesis of terpenoids and triterpenoids were also  
468 found up-regulated in only one *R* locus at 1 dpi, such as two and three terpene synthase genes in  
469 *Ren4D*<sup>+</sup> and *Ren4U*<sup>+</sup> accessions, respectively, as well as two and three oxidosqualene cyclase  
470 genes in *Run2.2*<sup>+</sup> and *Ren4D*<sup>+</sup> vines, respectively. Concerning the *R* locus-specific DEGs involved  
471 in cell wall rearrangement, the *Ren4U*<sup>+</sup> genotype had the largest number of both up- and down-  
472 regulated genes. The *Ren4U*<sup>+</sup>-specific up-regulated genes at 5 dpi included five cellulose synthase  
473 genes, six cellulose synthase-like genes and two callose synthase genes: *VviCals7*  
474 (VIT\_12s0028g00400) and *VviCals10* (VIT\_17s0000g10010). Another callose synthase gene,  
475 *VviCals11* (VIT\_00s0265g00050), was also found up-regulated in *Run1*<sup>+</sup> plants at 5 dpi. This  
476 result suggests that *VviCals11* could play a role in the accumulation of callose deposits described  
477 in *Run1*<sup>+</sup> plants (Feechan *et al.*, 2015).

478

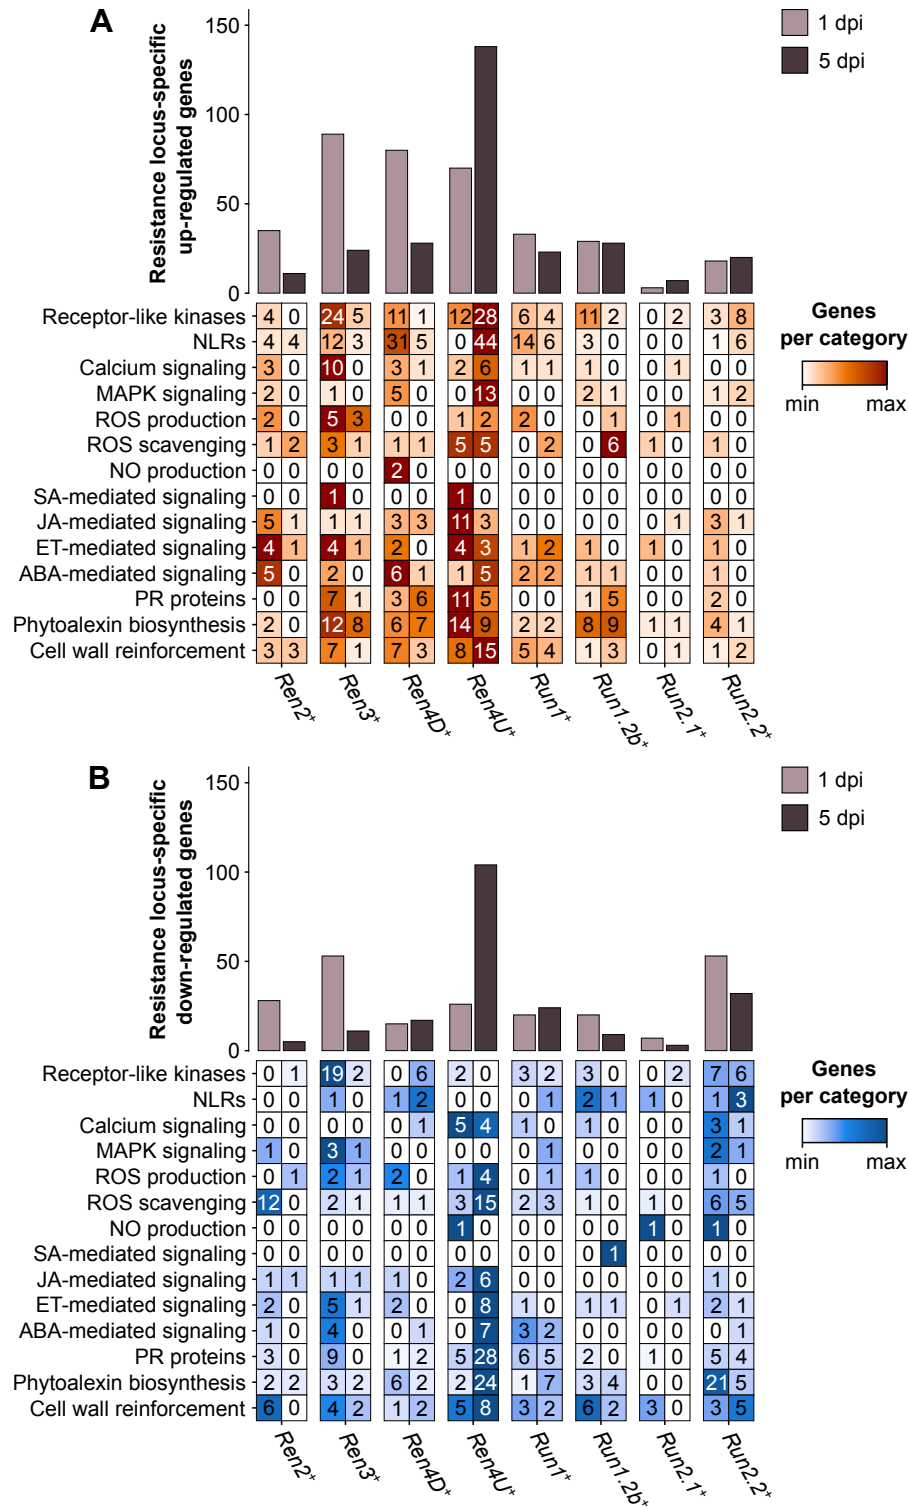

479

480 **Figure 7:** Defense-related categories among the genes identified as up-regulated (A) and down-  
481 regulated (B) by only one single PM resistance locus in response to *E. necator*.

482

## 483 **Discussion**

### 484 **Powdery mildew resistance loci confer different levels of resistance to *E. necator***

485 Evaluation of PM development using microscopy, visual scoring, and total *E. necator* transcript  
486 abundance, revealed differences of intensity and timing of the response to *E. necator* at 5 and 14  
487 dpi (**Figure 1; Supplementary Figure 1**). In particular, the *Ren2*, *Ren3* and *Run2.2* loci conferred  
488 a lower level of resistance to PM compared to the five other *R* loci. Similar disease phenotypes  
489 have been described for these *R* loci in previous studies (Qiu *et al.*, 2015; Dry *et al.*, 2019). The  
490 absence of primary hypha on the leaves of the *Ren4D*<sup>+</sup>, *Ren4U*<sup>+</sup>, *Run1*<sup>+</sup>, and *Run1.2b*<sup>+</sup> accessions  
491 and the very low transcript abundance for *E. necator* at 5 dpi suggest that restraint of the pathogen  
492 growth occurs rapidly in these vines, likely after haustorium formation at approximately 1 dpi  
493 (Leinhos *et al.*, 1997). In contrast, the presence of some secondary and tertiary hyphae on *Ren2*<sup>+</sup>,  
494 *Ren3*<sup>+</sup>, *Run2.1*<sup>+</sup>, and *Run2.2*<sup>+</sup> genotypes' leaves suggest that restriction of *E. necator* happens at  
495 later time, between 1 and 2 dpi (Leinhos *et al.*, 1997). In addition, fungal structures covered most  
496 of the leaves of *Ren2*<sup>+</sup> and *Ren3*<sup>+</sup> vines at 14 dpi, suggesting that these two *R* loci are less efficient  
497 in restricting the pathogen growth. Assessing the development of *E. necator* at additional time  
498 points post-inoculation and monitoring PCD would help to narrow down the difference of timing  
499 in the response to PM between the *R* loci. Furthermore, repeating the disease evaluation with  
500 additional breeding lines for each *R* locus would allow to confirm the observed phenotypes; while  
501 repeating the inoculation with additional *E. necator* isolates would help determine if the observed  
502 phenotypes are strain-specific.

503

### 504 **Adapting the reference transcriptome allows comparing the transcriptional modulations of** 505 **defense-related genes between different *Vitis* backgrounds**

506 This study encompassed fourteen accessions with different genetic backgrounds making the  
507 comparison of the gene expression from orthologous genes challenging. To cope with this  
508 challenge, we incorporated small sequence polymorphisms (SNPs and INDELs) compared to the  
509 grape PN40024 CDS into a diploid synthetic transcriptome for each grape accession and performed  
510 a *de novo* assembly of the unaligned RNA-seq reads. The sequence variant analysis revealed an  
511 elevated number of heterozygous SNPs in the leaf transcriptomes of interspecific and intergeneric

512 hybrids compared to pure *V. vinifera* cultivars, reflecting the genetic diversity among *Vitis* species  
513 and between *M. rotundifolia* and *Vitis* genera. The construction of the fourteen accession-specific  
514 reference transcriptomes improved the alignment of the RNA-seq reads (**Figure 3C**). Complete  
515 genome and/or transcriptome references of each grape accession would provide a more  
516 comprehensive representation of the defense-related genes and potentially a more accurate  
517 sequence for read alignment.

518 To assess the functional overlap among defense mechanisms between PM resistance loci, we  
519 focused our study on the transcriptional modulation of 2,694 defense-related genes in response to  
520 PM. These genes were selected based on functional domain composition and sequence similarity  
521 with proteins of *A. thaliana*. Although the defense-related genes identified might not be exhaustive  
522 and not definitive, the refinement of the functional annotation of PN40024 that was performed in  
523 this study represents a valuable resource for the present and future transcriptomic studies of grape-  
524 microbe interactions.

525

#### 526 **Powdery mildew resistance loci trigger the transcriptional modulation of different defense-** 527 **related genes in response to *E. necator***

528 By comparing the transcriptomes of PM- and mock-inoculated leaves of eight PM-resistant and  
529 six PM-susceptible grape accessions, we identified the defense-related DEGs associated with  
530 disease resistance (**Figure 4**). Although the comparison of the PM resistance-associated DEGs  
531 showed that the *R* loci shared DEGs to some extent, the overlap between two *R* loci was restricted  
532 ( $8.4 \pm 10.0$  %). It is worth noting that no defense-related gene was found differentially expressed  
533 in response to *E. necator* in more than five PM resistance loci (**Supplementary Figures 4-7**). In  
534 addition, around half of the PM resistance-associated DEGs of each *R* locus was found specific  
535 (**Figures 5 & 6**). Comparison of the *R* locus-specific DEGs showed that the eight *R* loci extensively  
536 differ in their transcriptional response to *E. necator* through the transcriptional modulation of  
537 specific defense-related genes (**Figure 7**). Interestingly, different allelic forms of the *Ren4*, *Run1*,  
538 and *Run2* genetic loci exhibited different responses to *E. necator* and even shared a larger number  
539 of DEGs with another genetic locus rather than with their respective haplotype (**Figures 5 & 6**).

540 To our knowledge, this study corresponds to the first attempt of comparing the transcriptional  
541 modulations in response to PM between multiple *R* genetic loci. Previous studies focused on a  
542 single *R* locus, a single PM-resistant accession (Fung *et al.*, 2007; Jiao *et al.*, 2021; Weng *et al.*,  
543 2014), or multiple haplotypes of a single genetic locus (Amrine *et al.*, 2015). Comparisons with  
544 previous studies are difficult because different protocol of inoculation and different strains of *E.*  
545 *necator* were used. Repeating the transcriptome profiling of additional recombinant lines for each  
546 *R* locus, both PM-resistant and PM-susceptible, combined with whole-genome sequencing would  
547 help dissect the *R* loci and identify the genes essential for resistance. Including other time points  
548 may provide additional information to understand gene expression modulation earlier and later  
549 than what considered in this study. For instance, few DEGs were detected for the *Run2.1*<sup>+</sup>  
550 accession, suggesting either that PM resistance is associated with the expression modulation of  
551 few genes or that the transcriptional reprogramming in response to *E. necator* occurs at a different  
552 time for the *Run2.1* locus.

553 Finally, this dataset represents a valuable resource for future breeding perspectives as it could help  
554 select the most functionally diverse *R* loci to introgress into *V. vinifera*.

555

## 556 **Data availability statement**

557 RNA sequencing data are accessible through NCBI under the BioProject PRJNA897013.

558

## 559 **Author contributions**

560 D.C, M.A.W, S.R, and M.M. designed the project. S.R and D.P performed the sample inoculation,  
561 collection, microscopy, and visual scoring. R.F.-B. extracted RNA and prepared sequencing  
562 libraries. M.M. performed the data analyses. M.M and D.C wrote the manuscript.

563

## 564 **Funding**

565 This work was partially funded by the American Vineyard Foundation grant #2017–1657 and the  
566 US Department of Agriculture (USDA)-National Institute of Food and Agriculture (NIFA)



567 Specialty Crop Research Initiative award #2017-51181-26829, and partially supported by funds to  
568 D.C. from Louis P. Martini Endowment in Viticulture.

569

## 570 **Conflict of interest**

571 The authors declare that the research was conducted in the absence of any commercial or financial  
572 relationships that could be construed as a potential conflict of interest.

573

## 574 **References**

575 Abe, H., Urao, T., Ito, T., Seki, M., Shinozaki, K., Yamaguchi-Shinozaki, K. (2003). *Arabidopsis*  
576 AtMYC2 (bHLH) and AtMYB2 (MYB) function as transcriptional activators in abscisic acid  
577 signaling. *Plant Cell*. 15(1), 63–78. doi: 10.1105/tpc.006130

578 Amrine, K. C., Blanco-Ulate, B., Riaz, S., Pap, D., Jones, L., Figueroa-Balderas, R., et al. (2015).  
579 Comparative transcriptomics of Central Asian *Vitis vinifera* accessions reveals distinct defense  
580 strategies against powdery mildew. *Hortic Res.* 2, 15037. doi: 10.1038/hortres.2015.37

581 Bolger, A. M., Lohse, M., Usadel, B. (2014). Trimmomatic: a flexible trimmer for Illumina  
582 sequence data. *Bioinformatics*. 30(15), 2114–2120. doi: 10.1093/bioinformatics/btu170

583 Calonnet, A., Cartolaro, P., Poupot, C., Dubourdieu, D., Darriet, P. (2004). Effects of *Uncinula*  
584 *necator* on the yield and quality of grapes (*Vitis vinifera*) and wine. *Plant Pathol.* 53, 434–445.  
585 doi: 10.1111/j.0032-0862.2004.01016.x

586 Cochetel, N., Minio, A., Massonnet, M., Vondras, A. M., Figueroa-Balderas, R., Cantu, D. (2021).  
587 Diploid chromosome-scale assembly of the *Muscadinia rotundifolia* genome supports  
588 chromosome fusion and disease resistance gene expansion during *Vitis* and *Muscadinia*  
589 divergence. *G3 (Bethesda)*. 11(4), jkab033. doi: 10.1093/g3journal/jkab033

590 Dalbó, M. A., Ye, G. N., Weeden, N. F., Wilcox, W. F., Reisch, B. I. (2001). Marker-assisted  
591 selection for powdery mildew resistance in grapes. *J Amer Soc Hort Sci.* 126(1), 83–89. doi:  
592 10.21273/JASHS.126.1.83

- 593 Danecek, P., Auton, A., Abecasis, G., Albers, C. A., Banks, E., DePristo, M. A., et al. (2011). The  
594 variant call format and VCFtools. *Bioinformatics*. 27(15), 2156–2158. doi:  
595 10.1093/bioinformatics/btr330
- 596 Dangl, J. L., Horvath, D. M., Staskawicz, B. J. (2013). Pivoting the plant immune system from  
597 dissection to deployment. *Science*. 341(6147), 746–751. doi: 10.1126/science.1236011
- 598 Dobin, A., Davis, C. A., Schlesinger, F., Drenkow, J., Zaleski, C., Jha, S., et al. (2013). STAR:  
599 ultrafast universal RNA-seq aligner. *Bioinformatics*. 29(1), 15–21. doi:  
600 10.1093/bioinformatics/bts635
- 601 Dombrecht, B., Xue, G. P., Sprague, S. J., Kirkegaard, J. A., Ross, J. J., Reid, J. B., et al. (2007).  
602 MYC2 differentially modulates diverse jasmonate-dependent functions in *Arabidopsis*. *Plant Cell*.  
603 19(7), 2225–2245. doi: 10.1105/tpc.106.048017
- 604 Dry, I., Riaz, S., Fuchs, M., Sosnowski, M., Thomas, M. (2019). “Scion breeding for resistance to  
605 biotic stresses” in *The Grape Genome*, ed. D. Cantu, and M. A. Walker (Springer Cham), 319–  
606 347. doi: 10.1007/978-3-030-18601-2
- 607 El-Gebali, S., Mistry, J., Bateman, A., Eddy, S. R., Luciani, A., Potter, S. C., et al. (2019). The  
608 Pfam protein families database in 2019. *Nucleic Acids Res.* 47(D1), D427–D432. doi:  
609 10.1093/nar/gky995
- 610 Engström, P. G., Steijger, T., Sipos, B., Grant, G. R., Kahles, A., Rättsch, G., et al. (2013).  
611 Systematic evaluation of spliced alignment programs for RNA-seq data. *Nat Methods*. 10(12),  
612 1185–1191. doi: 10.1038/nmeth.2722
- 613 Feechan, A., Anderson, C., Torregrosa, L., Jermakow, A., Mestre, P., Wiedemann-Merdinoglu, S.,  
614 et al. (2013). Genetic dissection of a TIR-NB-LRR locus from the wild North American grapevine  
615 species *Muscadinia rotundifolia* identifies paralogous genes conferring resistance to major fungal  
616 and oomycete pathogens in cultivated grapevine. *Plant J.* 76(4), 661–674. doi: 10.1111/tpj.12327
- 617 Feechan, A., Kocsis, M., Riaz, S., Zhang, W., Gadoury, D. M., et al. (2015). Strategies for *RUN1*  
618 deployment using *RUN2* and *REN2* to manage grapevine powdery mildew informed by studies of  
619 race specificity. *Phytopathology*. 105(8), 1104–1113. doi: 10.1094/PHYTO-09-14-0244-R

- 620 Fung, R. W., Gonzalo, M., Fekete, C., Kovacs, L. G., He, Y., Marsh, E., et al. (2008). Powdery  
621 mildew induces defense-oriented reprogramming of the transcriptome in a susceptible but not in a  
622 resistant grapevine. *Plant Physiol.* 146(1), 236–249. doi: 10.1104/pp.107.108712
- 623 Gautam, J. K., Giri, M. K., Singh, D., Chattopadhyay, S., Nandi, A. K. (2021). MYC2 influences  
624 salicylic acid biosynthesis and defense against bacterial pathogens in *Arabidopsis thaliana*.  
625 *Physiol Plant.* 173(4), 2248–2261. doi: 10.1111/ppl.13575
- 626 Grabherr, M. G., Haas, B. J., Yassour, M., Levin, J. Z., Thompson, D. A., Amit, I., et al. (2011).  
627 Full-length transcriptome assembly from RNA-Seq data without a reference genome. *Nat*  
628 *Biotechnol.* 29(7), 644–652. doi: 10.1038/nbt.1883
- 629 Huson, D. H., Beier, S., Flade, I., Górska, A., El-Hadidi, M., Mitra, S., et al. (2016). MEGAN  
630 Community Edition - Interactive Exploration and Analysis of Large-Scale Microbiome  
631 Sequencing Data. *PLoS Comput Biol.* 12(6), e1004957. doi: 10.1371/journal.pcbi.1004957
- 632 Jaillon, O., Aury, J. M., Noel, B., Policriti, A., Clepet, C., Casagrande, A., et al. (2007). The  
633 grapevine genome sequence suggests ancestral hexaploidization in major angiosperm phyla.  
634 *Nature.* 449(7161), 463–467. doi: 10.1038/nature06148
- 635 Jiao, C., Sun, X., Yan, X., Xu, X., Yan, Q., Gao, M., et al. (2021). Grape transcriptome response  
636 to powdery mildew infection: comparative transcriptome profiling of Chinese wild grapes provides  
637 insights into powdery mildew resistance. *Phytopathology.* 111(11), 2041–2051. doi:  
638 10.1094/PHYTO-01-21-0006-R
- 639 Jones, L., Riaz, S., Morales-Cruz, A., Amrine, K. C., McGuire, B., Gubler, W. D., et al. (2014).  
640 Adaptive genomic structural variation in the grape powdery mildew pathogen, *Erysiphe necator*.  
641 *BMC Genomics.* 15(1), 1081. doi: 10.1186/1471-2164-15-1081
- 642 Karn, A., Zou, C., Brooks, S., Fresnedo-Ramírez, J., Gabler, F., Sun, Q., et al. (2021). Discovery  
643 of the *REN11* locus from *Vitis aestivalis* for stable resistance to grapevine powdery mildew in a  
644 family segregating for several unstable and tissue-specific quantitative resistance loci. *Front Plant*  
645 *Sci.* 12, 733899. doi: 10.3389/fpls.2021.733899
- 646 Langmead, B., and Salzberg, S. L. (2012). Fast gapped-read alignment with Bowtie 2. *Nat*  
647 *Methods.* 9(4), 357–359. doi: 10.1038/nmeth.1923

- 648 Leinhos, G. M. E., Gold, R. E., Duggelin, M., Guggenheim, R. (1997). Development and  
649 morphology of *Uncinula necator* following treatment with the fungicides kresoxim-methyl and  
650 penconazole. *Mycol Res.*101(9), 1033-1046.
- 651 Li, W., and Godzik, A. (2006). Cd-hit: a fast program for clustering and comparing large sets of  
652 protein or nucleotide sequences. *Bioinformatics.* 22(13), 1658–1659. doi:  
653 10.1093/bioinformatics/btl158
- 654 Liang, Z., Duan, S., Sheng, J., Zhu, S., Ni, X., Shao, J., et al. (2019). Whole-genome resequencing  
655 of 472 *Vitis* accessions for grapevine diversity and demographic history analyses. *Nat. Commun.*  
656 10(1), 1190. doi: 10.1038/s41467-019-09135-8
- 657 Lolle, S., Stevens, D., Coaker, G. (2020). Plant NLR-triggered immunity: from receptor activation  
658 to downstream signaling. *Curr Opin Immunol.* 62, 99–105. doi: 10.1016/j.coi.2019.12.007
- 659 Love, M. I., Huber, W., Anders, S. (2014). Moderated estimation of fold change and dispersion  
660 for RNA-seq data with DESeq2. *Genome Biol.* 15, 550. doi: 10.1186/s13059-014-0550-8
- 661 Massonnet, M., Vondras, A. M., Cochetel, N., Riaz, S., Pap, D., Minio, A., et al. (2022).  
662 Haplotype-resolved powdery mildew resistance loci reveal the impact of heterozygous structural  
663 variation on NLR genes in *Muscadinia rotundifolia*. *G3 (Bethesda).* 12(8), jkac148. doi:  
664 10.1093/g3journal/jkac148.
- 665 McKenna, A., Hanna, M., Banks, E., Sivachenko, A., Cibulskis, K., Kernytsky, A., et al. (2010).  
666 The Genome Analysis Toolkit: a MapReduce framework for analyzing next-generation DNA  
667 sequencing data. *Genome Res.* 20(9), 1297–1303. doi: 10.1101/gr.107524.110
- 668 Michelmore, R. W., Christopoulou, M., Caldwell, K. S. (2013). Impacts of resistance gene  
669 genetics, function, and evolution on a durable future. *Annu Rev Phytopathol.* 51, 291–319. doi:  
670 10.1146/annurev-phyto-082712-102334
- 671 Minio, A., Cochetel, N., Massonnet, M., Figueroa-Balderas, R., Cantu, D. (2022). HiFi  
672 chromosome-scale diploid assemblies of the grape rootstocks 110R, Kober 5BB, and 101-14 Mgt.  
673 *Sci Data.* 9(1), 660. doi: 10.1038/s41597-022-01753-0

- 674 Paniagua, C., Bilkova, A., Jackson, P., Dabravolski, S., Riber, W., Didi, V., et al. (2017). Dirigent  
675 proteins in plants: modulating cell wall metabolism during abiotic and biotic stress exposure. *J*  
676 *Exp Bot.* 68(13), 3287–3301. doi: 10.1093/jxb/erx141
- 677 Pap, D., Riaz, S., Dry, I. B., Jermakow, A., Tenscher, A. C., Cantu, D., et al. (2016). Identification  
678 of two novel powdery mildew resistance loci, *Ren6* and *Ren7*, from the wild Chinese grape species  
679 *Vitis piasezkii*. *BMC Plant Biol.* 16(1), 170. doi: 10.1186/s12870-016-0855-8
- 680 Patro, R., Duggal, G., Love, M. I., Irizarry, R. A., Kingsford, C. (2017). Salmon provides fast and  
681 bias-aware quantification of transcript expression. *Nat. Methods.* 14(4), 417–419. doi:  
682 10.1038/nmeth.4197
- 683 Qiu, W., Feechan, A., Dry, I. (2015). Current understanding of grapevine defense mechanisms  
684 against the biotrophic fungus (*Erysiphe necator*), the causal agent of powdery mildew disease.  
685 *Hortic Res.* 2, 15020 (2015). doi: 10.1038/hortres.2015.20
- 686 Quinlan A. R. (2014). BEDTools: The Swiss-Army Tool for Genome Feature Analysis. *Curr*  
687 *Protoc Bioinformatics.* 47, 11.12.1–11.12.34. doi: 10.1002/0471250953.bi1112s47
- 688 Ramming, D. W., Gabler, F., Smilanick, J., Cadle-Davidson, M., Barba, P., Mahanil, S., et al.  
689 (2011). A single dominant locus, *ren4*, confers rapid non-race-specific resistance to grapevine  
690 powdery mildew. *Phytopathology.* 101(4), 502–508. doi: 10.1094/PHYTO-09-10-0237
- 691 Riaz, S., Tenscher, A. C., Ramming, D. W., Walker, M. A. (2011). Using a limited mapping  
692 strategy to identify major QTLs for resistance to grapevine powdery mildew (*Erysiphe necator*)  
693 and their use in marker-assisted breeding. *Theor Appl Genet.* 122, 1059–1073. doi:  
694 10.1007/s00122-010-1511-6
- 695 Riaz, S., Lejkina, I., Gubler, W., Walker, M. A. (2013). Report of a new grape powdery mildew  
696 morphotype with branched conidiophores. *Plant Pathol Quar.* 3, 19–27.
- 697 Soneson, C., Love, M. I., Robinson, M. D. (2015). Differential analyses for RNA-seq: transcript-  
698 level estimates improve gene-level inferences. *F1000Res.* 4, 1521. doi:  
699 10.12688/f1000research.7563.2

- 700 Staswick, P. E., and Tiryaki, I. (2004). The oxylipin signal jasmonic acid is activated by an enzyme  
701 that conjugates it to isoleucine in *Arabidopsis*. *Plant Cell*. 16(8), 2117–2127. doi:  
702 10.1105/tpc.104.023549
- 703 Stummer, B.E., Francis, I.L., Zanker, T., Lattey, K.A., Scott, E.S. (2005) Effects of powdery  
704 mildew on the sensory properties and composition of Chardonnay juice and wine when grape sugar  
705 ripeness is standardised. *Aust J Grape Wine Res.* 11, 66–76. doi: 10.1111/j.1755-  
706 0238.2005.tb00280.x
- 707 Trapnell, C., Williams, B. A., Pertea, G., Mortazavi, A., Kwan, G., van Baren, M. J., et al. (2010).  
708 Transcript assembly and quantification by RNA-Seq reveals unannotated transcripts and isoform  
709 switching during cell differentiation. *Nat Biotechnol.* 28(5), 511–515. doi: 10.1038/nbt.1621
- 710 Weng, K., Li, Z. Q., Liu, R. Q., Wang, L., Wang, Y. J., Xu, Y. (2014). Transcriptome of *Erysiphe*  
711 *necator*-infected *Vitis pseudoreticulata* leaves provides insight into grapevine resistance to  
712 powdery mildew. *Hortic Res.* 1, 14049. doi: 10.1038/hortres.2014.49
- 713 Yu, Y., Jiao, L., Fu, S., Yin, L., Zhang, Y., Lu, J. (2016). Callose synthase family genes involved  
714 in the grapevine defense response to downy mildew disease. *Phytopathology*. 106(1), 56–64. doi:  
715 10.1094/PHYTO-07-15-0166-R
- 716 Zhang, G., Yan, X., Zhang, S., Zhu, Y., Zhang, X., Qiao, H., van Nocker, S., Li, Z., & Wang, X.  
717 (2019). The jasmonate-ZIM domain gene *VqJAZ4* from the Chinese wild grape *Vitis*  
718 *quinquangularis* improves resistance to powdery mildew in *Arabidopsis thaliana*. *Plant Physiol*  
719 *Biochem.* 143, 329–339. doi: 10.1016/j.plaphy.2019.09.018
- 720 Zhou, Y., Minio, A., Massonnet, M., Solares, E., Lv, Y., Beridze, T., et al. (2019). The population  
721 genetics of structural variants in grapevine domestication. *Nat Plants*. 5(9), 965–979. doi:  
722 10.1038/s41477-019-0507-8
- 723 Zyprian, E., Ochßner, I., Schwander, F., Šimon, S., Hausmann, L., Bonow-Rex, M., et al. (2016).  
724 Quantitative trait loci affecting pathogen resistance and ripening of grapevines. *Mol Genet*  
725 *Genomics.* 291(4), 1573–1594. doi: 10.1007/s00438-016-1200-5
